# Supplementary material
Source: PubMed Central journal article supplement (PMC1082849)

# Average forcing from 1995 to 1999 (Annual mean values)

A) TOA forcing

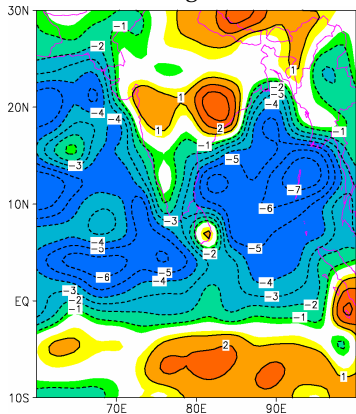

B) Surface forcing

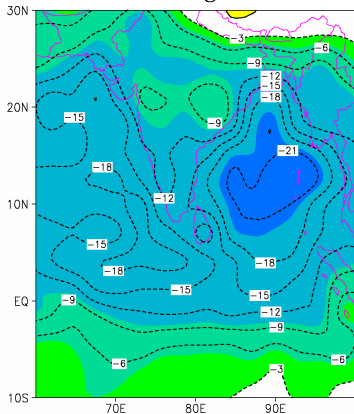

C) Atmospheric forcing

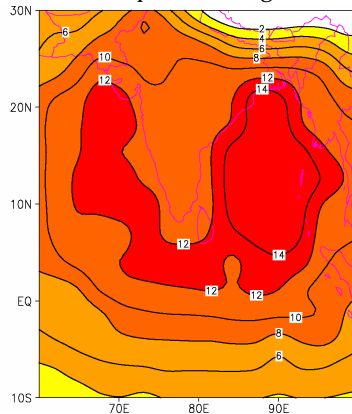

Supplement: pnas_102_15_5326__2.pdf [file pnas_102_15_5326__2.pdf]
