# Supplementary material
Source: PubMed Central journal article supplement (PMC1082849)

## Seasonal variation

(Regional and temporal average from 1995 to 1999)

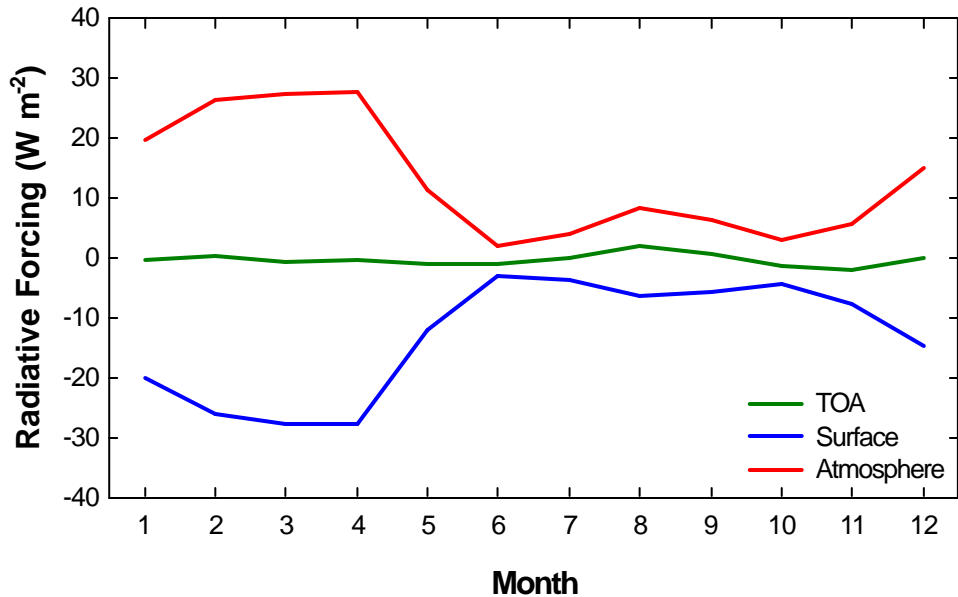

Supplement: pnas_102_15_5326__3.pdf [file pnas_102_15_5326__3.pdf]

# 1930- 2000 India- average trend: global model

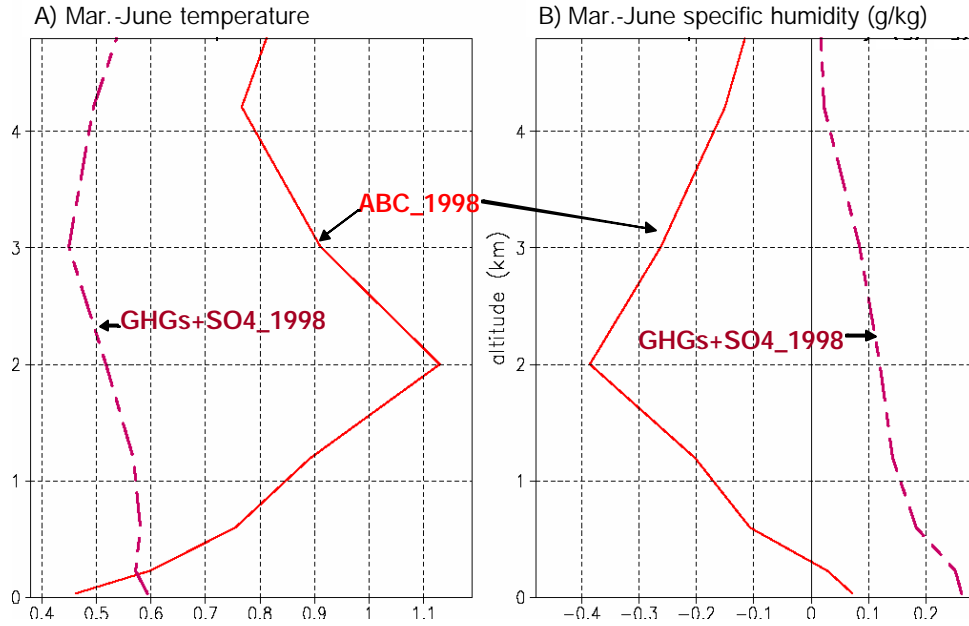

Supplement: pnas_102_15_5326__4.pdf [file pnas_102_15_5326__4.pdf]

## ABC effects in 1985-2000 (60-100°E streamline)

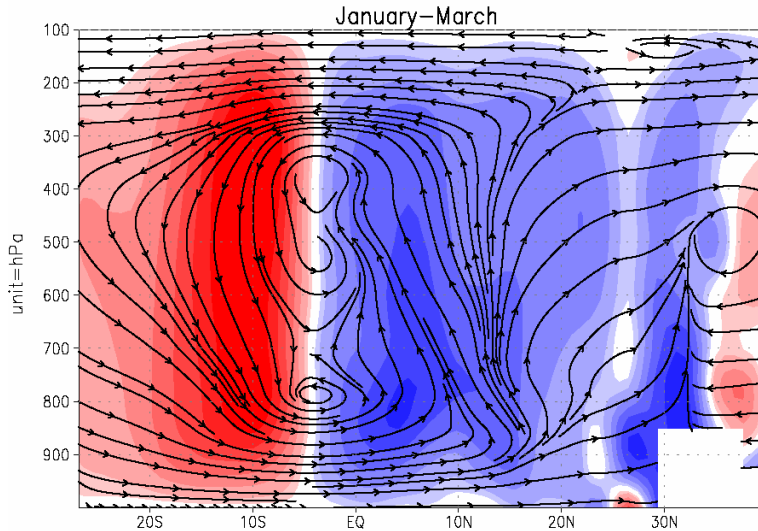

Supplement: pnas_102_15_5326__5.pdf [file pnas_102_15_5326__5.pdf]
